## **1. Title**

Title: Comprehensive Analysis of Theoretical Models and Frameworks for Investigating Determinants of Breast Cancer Screening Participation: A Scoping Review

## **2. Author list**

a) Dandan Zheng, PhD, Mahidol University, Faculty of Nursing  
999 Phutthamonthon 4 Road, Salaya, Phutthamonthon, Nakhon Pathom, 73170, P.R. Thailand Email: 1031593396@qq.com

b) Aurawamon Sriyuktasuth, Assoc Prof, Mahidol University, Faculty of Nursing, 999 Phutthamonthon 4 Road, Salaya, Phutthamonthon, Nakhon Pathom, 73170, P.R. Thailand. Email: xiaoxuzong616@163.com

c) Pichitra Lekdamrongkul, Asst Prof, Mahidol University, Faculty of Nursing, 999 Phutthamonthon 4 Road, Salaya, Phutthamonthon, Nakhon Pathom, 73170, P.R. Thailand, Email: 1537180870@163.com

## **3. The following withdrawal statement:**

"The authors have withdrawn this manuscript because of erroneous data, with potential implications of academic misconduct. Therefore, the authors do not wish this work to be cited as reference for the project. If you have any questions, please contact the corresponding author."
